# Supplementary material
Source: PubMed Central journal article supplement (PMC4854674)
Supplement: supp_pp.15.01537_01537suppfigs.pdf [file supp_pp.15.01537_01537suppfigs.pdf]

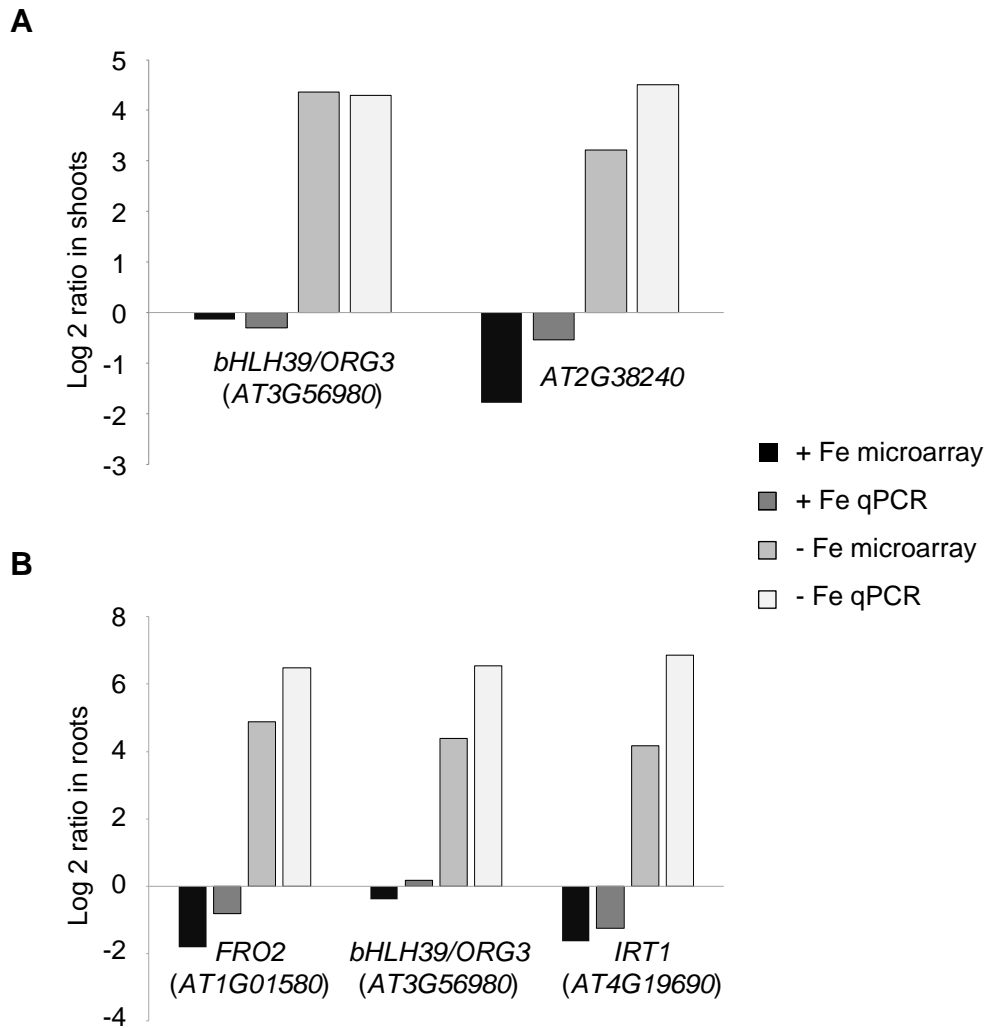

**Figure S1.** RT-qPCR validation of the results obtained in the microarray analysis.

Plants were treated as described in Fig. 1 and RNAs were extracted from shoots or roots 3 days after apo-pyo treatment.

A. Expression of *bHLH39/ORG3* and *AT2G38240* in shoots

B. Expression of *FRO2*, *bHLH39/ORG3* and *IRT1* in roots

Gene expression was normalized against transcript levels of the housekeeping genes *AT5G08290* and *AT4G26410* and was expressed in log<sub>2</sub> ratio to enable simple comparison with the CATMA transcriptomic data.

+ Fe: Fe 25 apo-pyo versus Fe 25; - Fe: Fe 25 apo-pyo versus Fe 25.

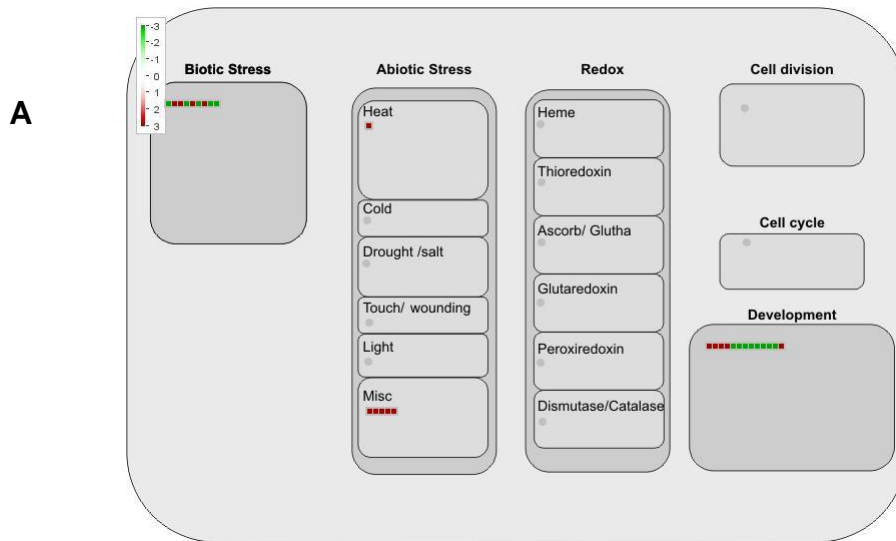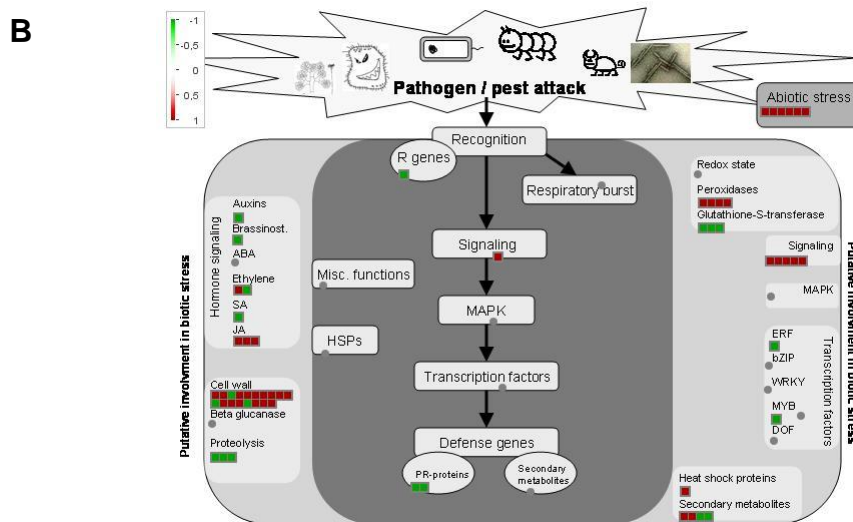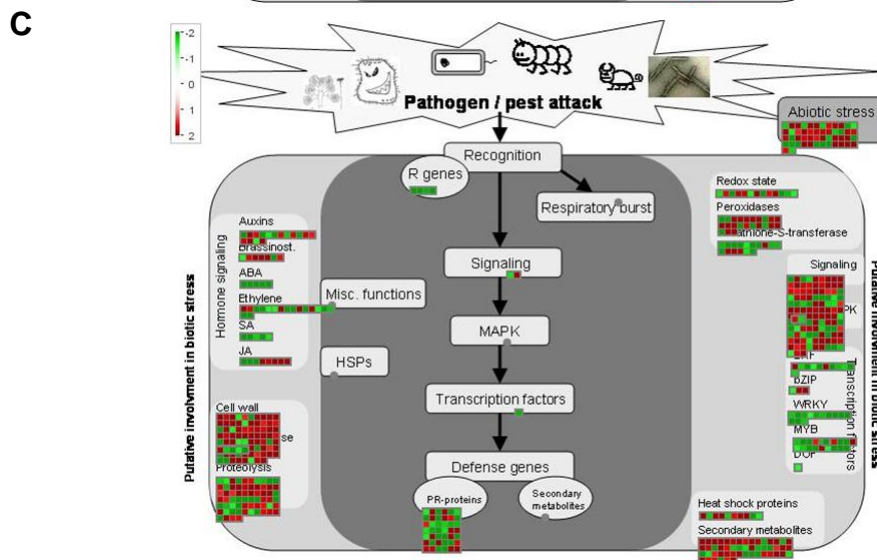

**Figure S2.** Mapman analysis of genes modulated by apo-pyo in the roots of plants facing iron deficiency. A. General classification based on cellular responses ( $\log_2$  ratio  $\geq +3$  or  $\leq -3$ ;  $p$ -value  $\leq 0.05$ ). B. Focus on the genes involved in biotic stress responses with  $\log_2$  ratio  $\geq +3$  or  $\leq -3$  ( $p$ -value  $\leq 0.05$ ). C. Focus on the genes involved in biotic stress responses with  $\log_2$  ratio  $\geq +1.5$  or  $\leq -1.5$  ( $p$ -value  $\leq 0.05$ ).

Dataset: 544 perturbations (sample selection: AT-SAMPLES-1)  
 148 genes (gene selection: AT-SIGNATURE-1)

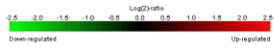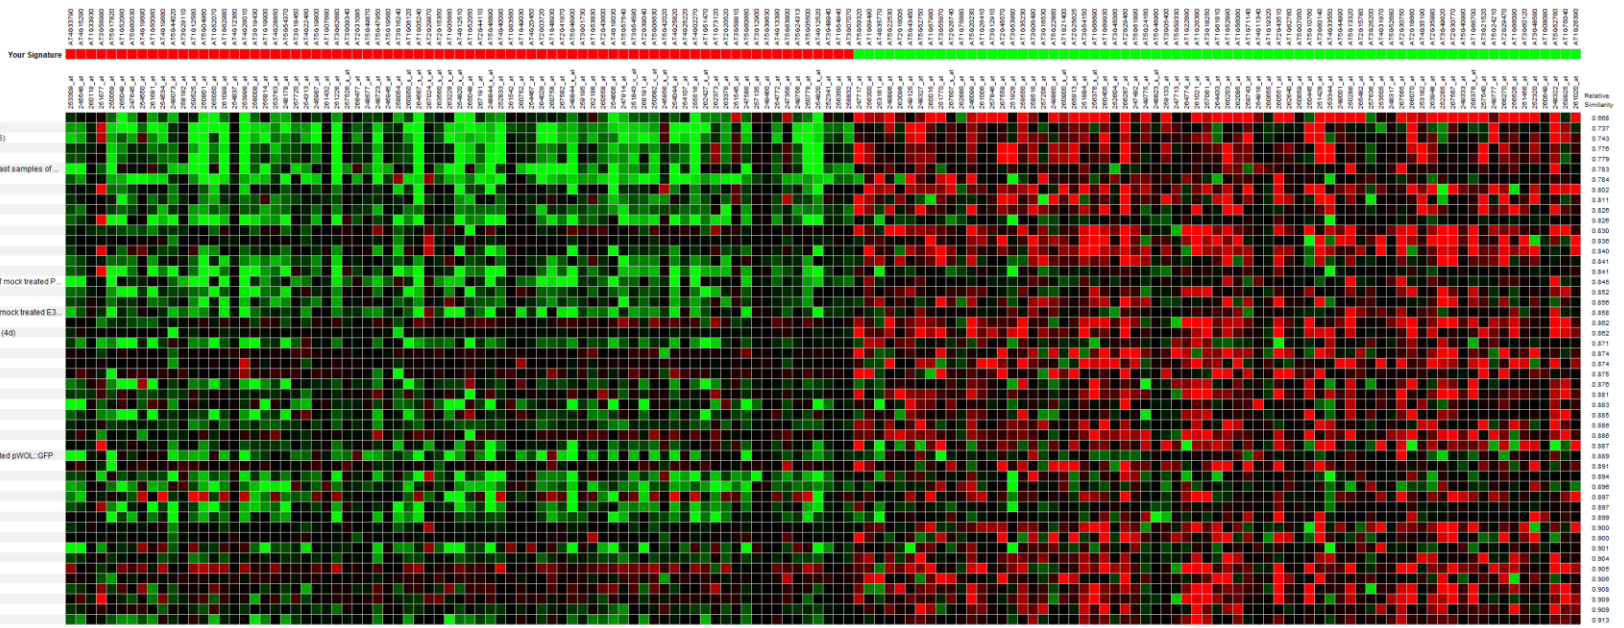

created with GENEVESTIGATOR

**Figure S3.** Comparison between the profile of expression of the most induced and repressed genes by apo-pyo in the roots in iron-deficiency medium (log 2 ratio  $\geq + 3$  or  $\leq - 3$ ) to the profiles of other transcriptomic data (most different perturbations). The results were generated using the tool “signature” of Genevestigator with the particular condition "hormones".

Dataset: 326 perturbations (sample selection: AT-SAMPLES-2)

149 genes (gene selection: AT-SIGNATURE-1)

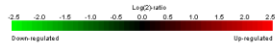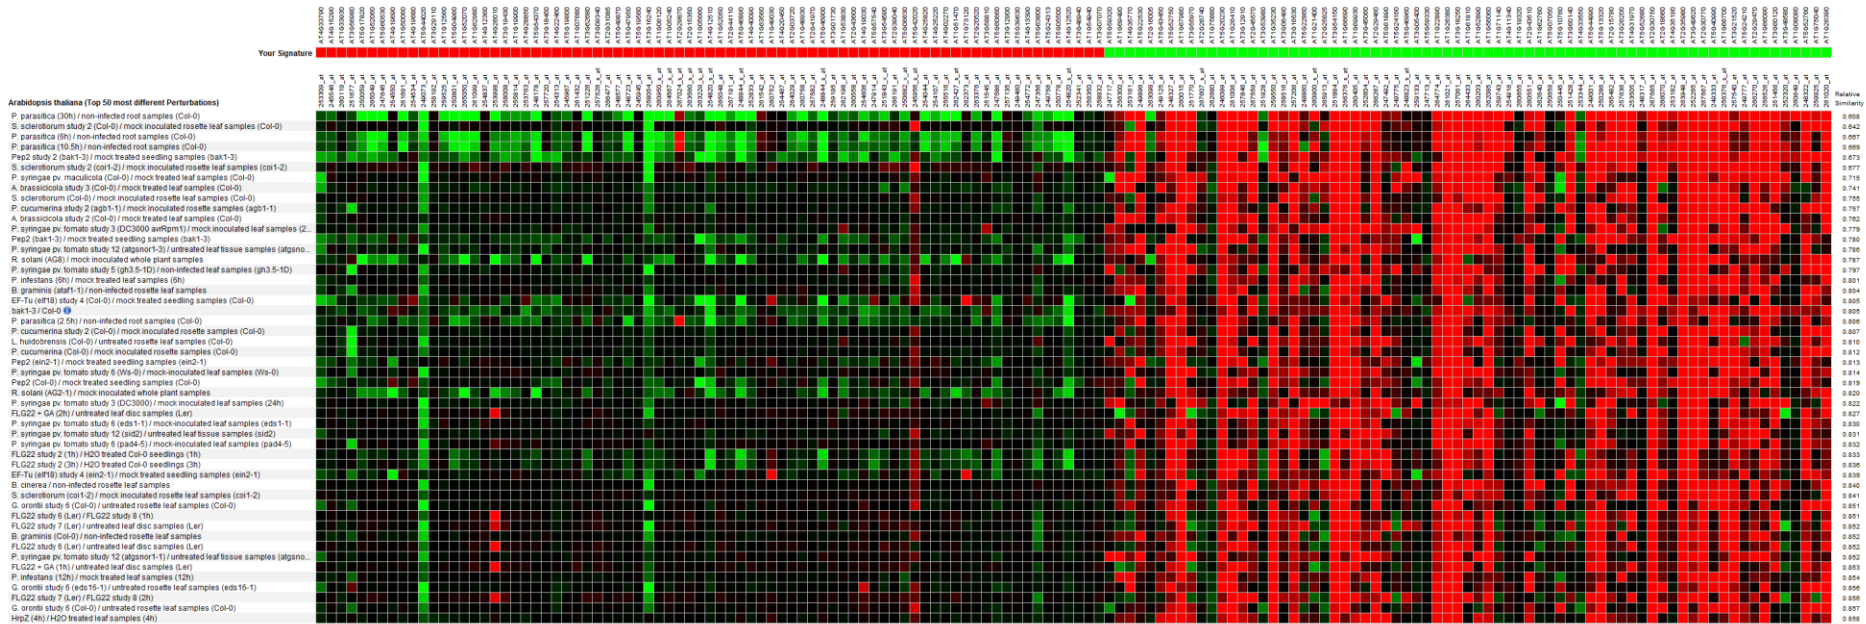

created with GENEVESTIGATOR

**Figure S4.** Comparison between the profile of expression of the most induced and repressed genes by apo-pyo in the roots in iron-deficiency medium ( $\log_2$  ratio  $\geq +3$  or  $\leq -3$ ) to the profiles of other transcriptomic data (most different perturbations). The results were generated using the tool “signature” of Genevestigator with the particular conditions "elicitor" and "biotic".

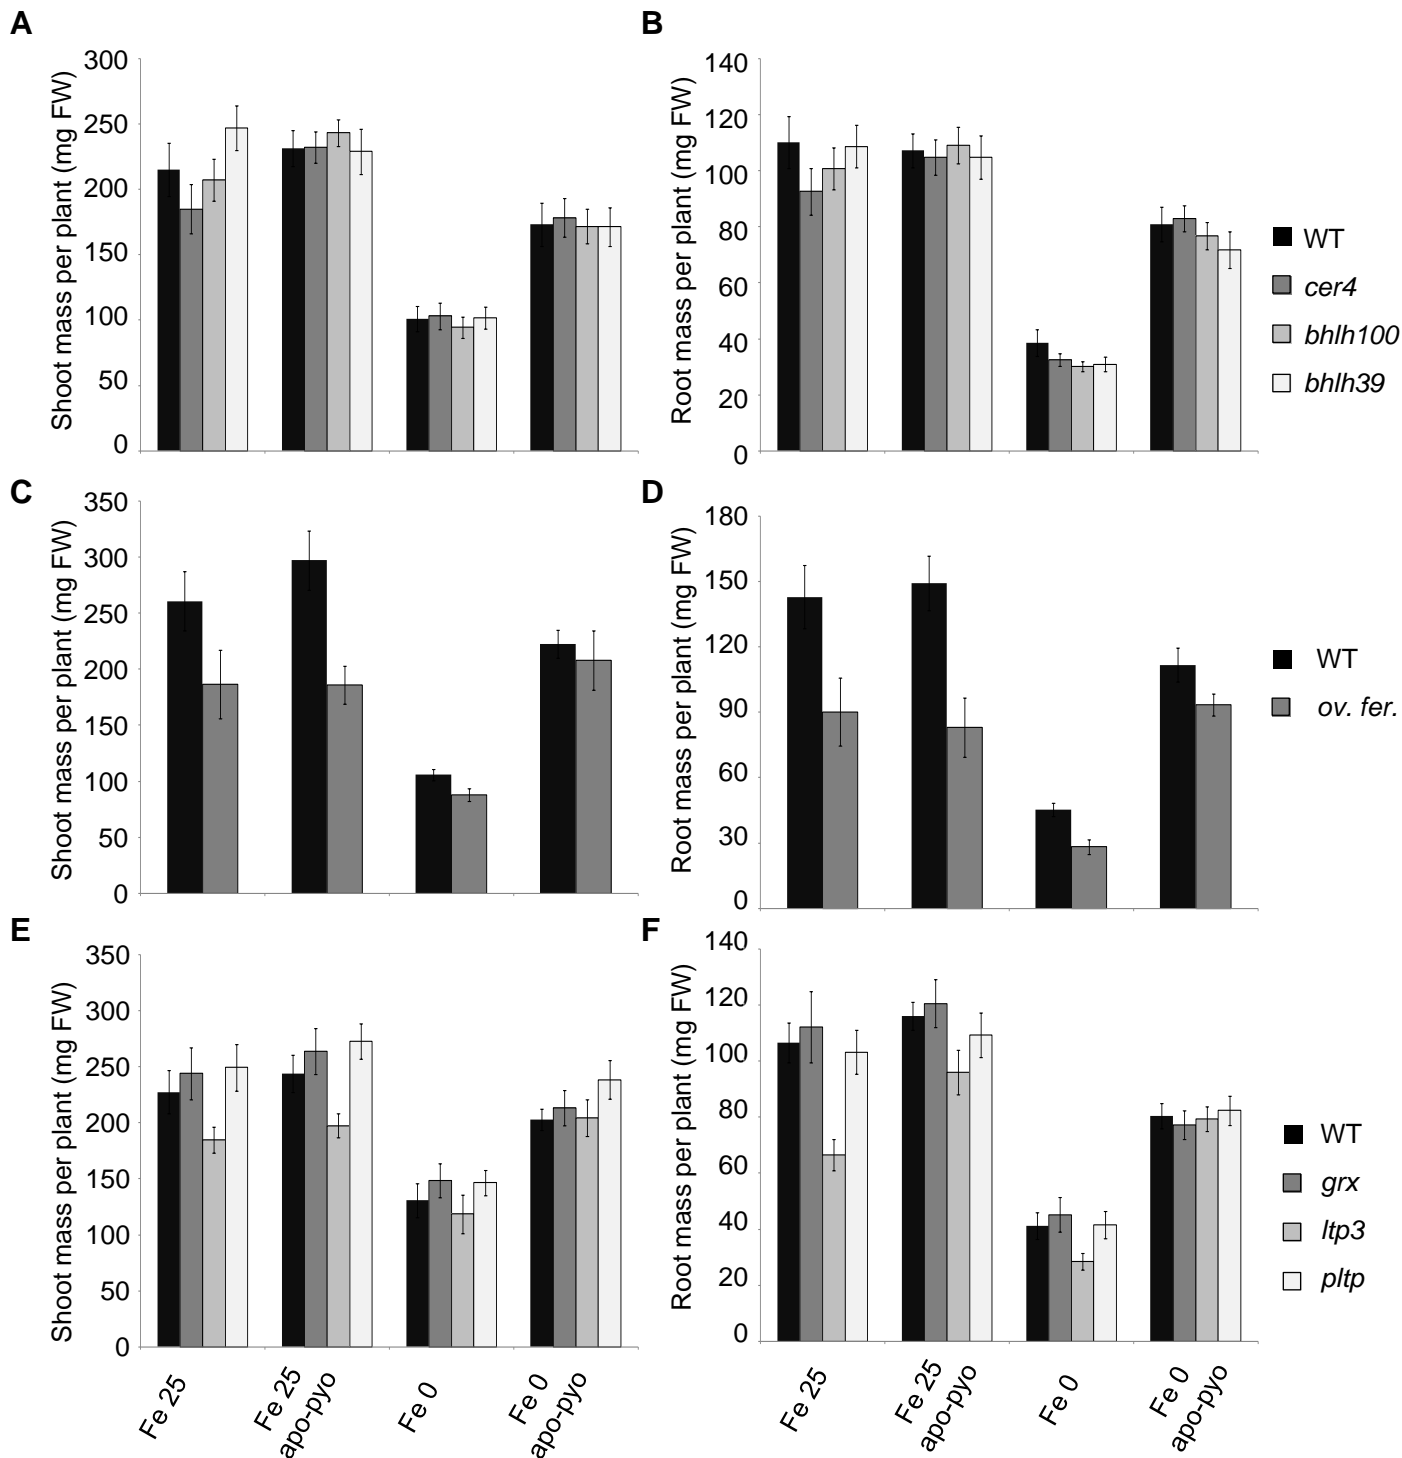

**Figure S5.** Growth phenotypes of mutants overexpressing or impaired in genes involved in iron homeostasis (*bhlh100*, *bhlh39*, *ov. fer.*) or defense responses or/and growth (*cer4*, *grx*, *ltp3* and *pltp*) in response to apo-pyo in iron sufficient or in iron deficient medium.

Plants were treated as described in Fig. 2.

A,B. Fresh shoot and root masses measured in WT, *cer4*, *bhlh100* and *bhlh39*.

C,D. Fresh shoot and root masses measured in WT and *ov. fer.*

E,F. Fresh shoot and root masses measured in WT, *grx*, *ltp3* and *pltp*.

Each value represents the mean  $\pm$  SE of almost 12 measurements from almost 3 independent biological experiments. Two-way ANOVA followed by Tukey's HSD revealed no significant difference between the shoot and root masses of WT and of the mutants in response to apo-pyoverdine or iron deficiency ( $P < 0.05$ ). FW: fresh weight.

Dataset: 3283 perturbations (sample selection: AT-SAMPLES-0)  
 97 genes (gene selection: AT-SIGNATURE-1)

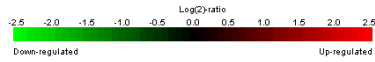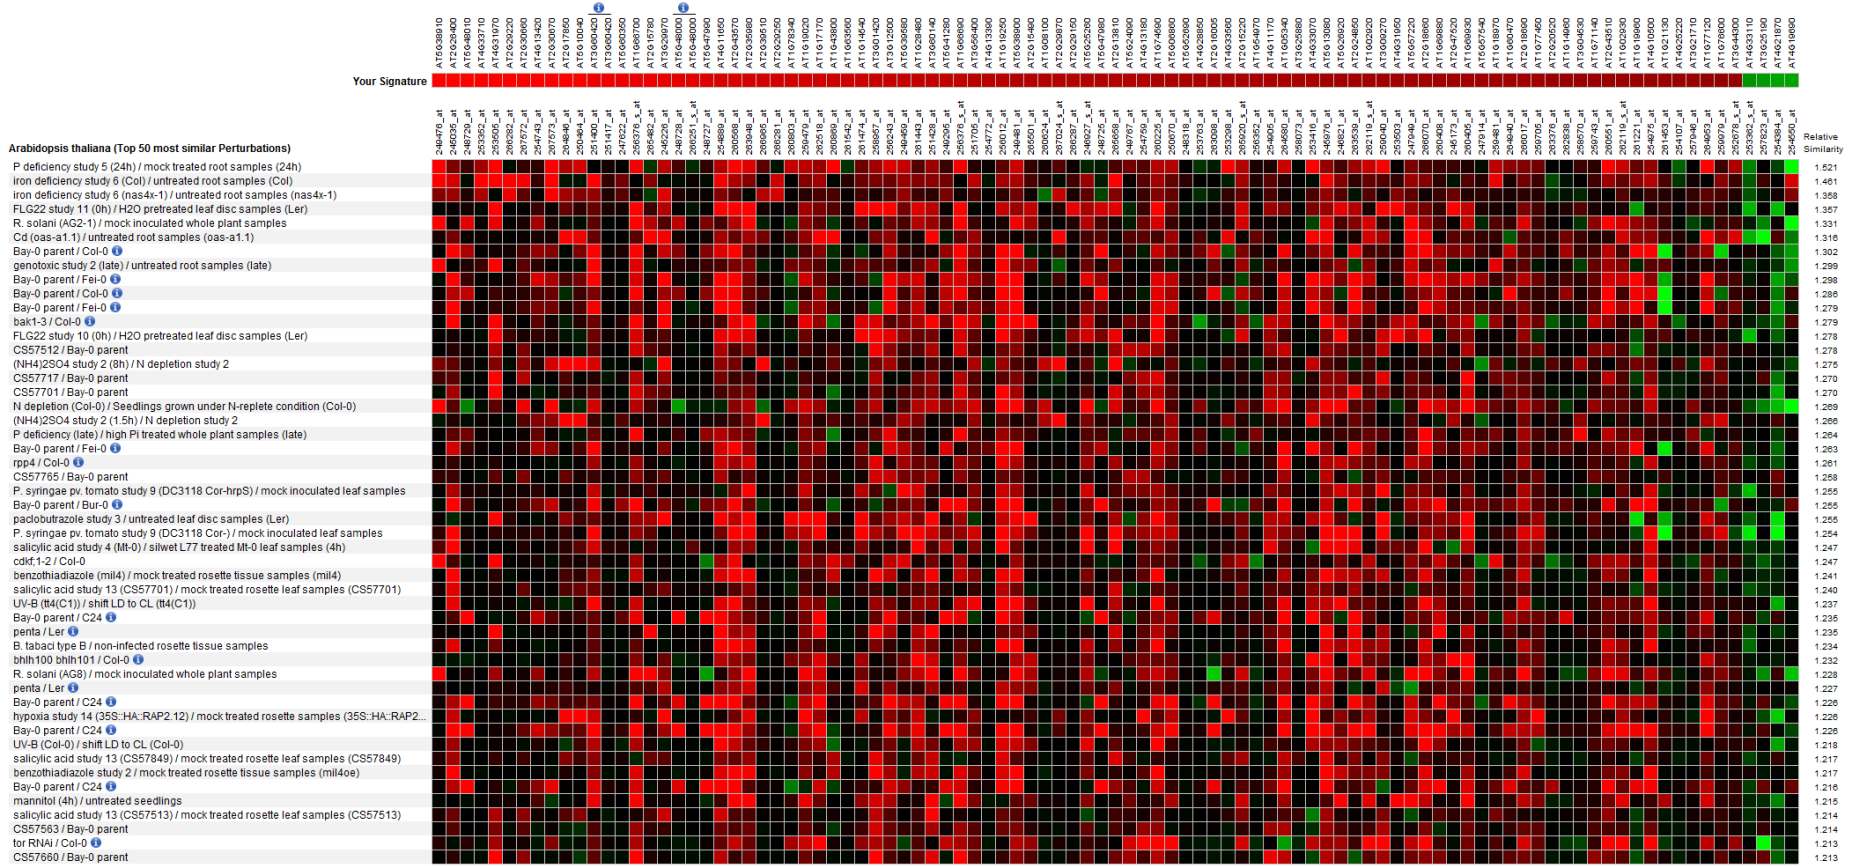

created with GENEVESTIGATOR

**Figure S6.** Comparison between the profile of expression of the genes modulated by apo-pyo in the roots in iron-containing medium ( $\log_2$  ratio  $\geq +1.5$  or  $\leq -1.5$ ) to the profiles of other transcriptomic data (most similar perturbations). The results were generated using the tool “signature” of Genevestigator.

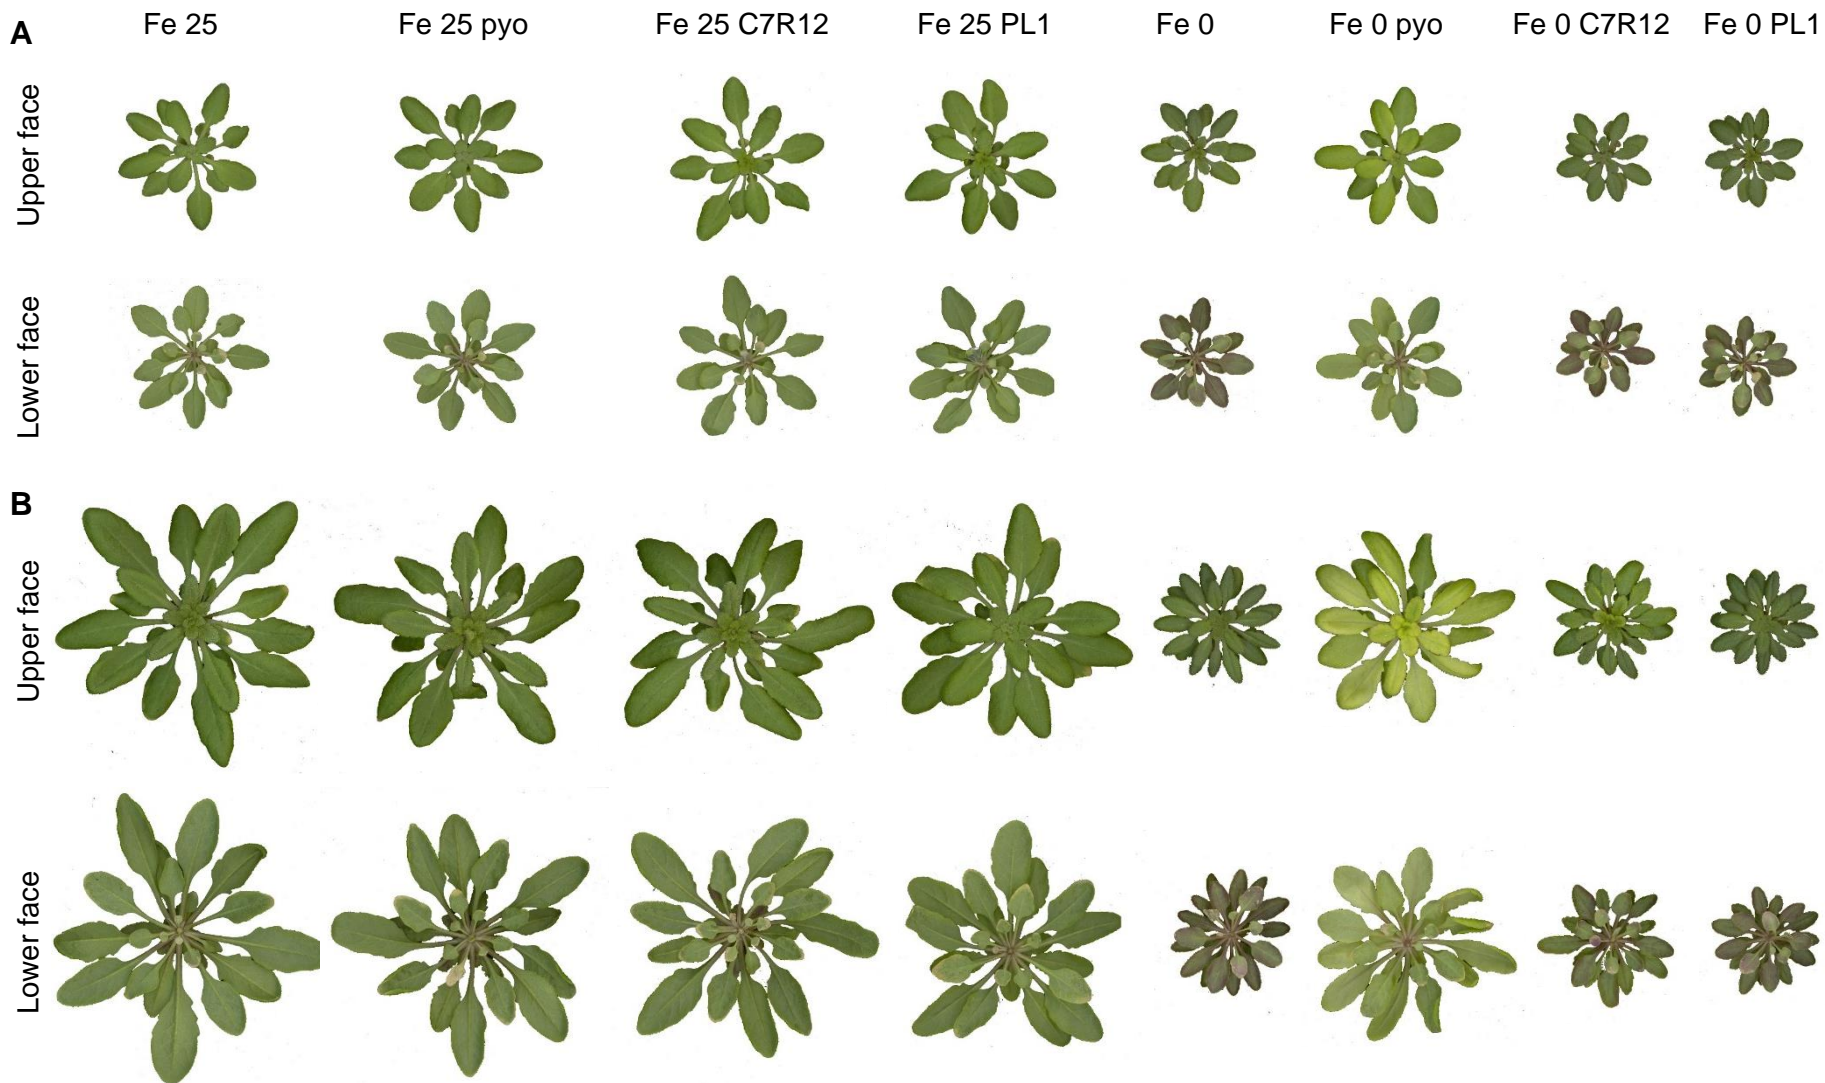

**Figure S7.** Rosette macroscopic phenotype of *A. thaliana* plantlets exposed to apo-pyo or inoculated with the C7R12 or PL1 strains in iron-sufficient or iron-deficient conditions.

Plants were cultivated and treated by apo-pyo as indicated in Fig. 1 or by C7R12 or PL1 bacteria as described in the Materials and Methods section.

A. Phenotypes were observed 7 days after the addition of apo-pyo, C7R12 or PL1 bacteria.

B. Phenotypes were observed 14 days after the addition of apo-pyo, C7R12 or PL1 bacteria.

Results are representative of 3 experiments.
